# Supplementary material for: Release of graphene-related materials from epoxy-based composites: characterization, quantification and hazard assessment in vitro
Source: Royal Society of Chemistry journal article supplement (doi:10.1039/c9nr10245k), 2020-01-01
Supplement: c9nr10245k1.pdf [file c9nr10245k1.pdf]

1 **Supplementary information**

2 **Release of graphene-related materials from epoxy-based composites: characterization,**  
3 **quantification and hazard assessment in vitro**

4 Woranan Netkueakul<sup>1,2,#</sup>, Daria Korejwo<sup>3,4,#</sup>, Tobias Hammer<sup>1,2</sup>, Savvina Chortarea<sup>3</sup>, Patrick Rupper<sup>5</sup>,  
5 Oliver Braun<sup>6,7</sup>, Michel Calame<sup>5,6,8</sup>, Barbara Rothen-Rutishauser<sup>4</sup>, Tina Buerki-Thurnherr<sup>3</sup>, Peter  
6 Wick<sup>3,#</sup>, Jing Wang<sup>1,2,+</sup>

7 <sup>1</sup> Institute of Environmental Engineering, ETH Zurich, 8093, Zurich, Switzerland

8 <sup>2</sup> Laboratory for Advanced Analytical Technologies, Empa, Swiss Federal Laboratories for Materials  
9 Science and Technology, 8600, Dübendorf, Switzerland

10 <sup>3</sup> Particles-Biology Interactions Lab, Empa, Swiss Federal Laboratories for Materials Science and  
11 Technology, 9014, St. Gallen, Switzerland

12 <sup>4</sup> Adolphe Merkle Institute, University of Fribourg, 1700 Fribourg, Switzerland

13 <sup>5</sup> Laboratory for Advanced Fibers, Empa, Swiss Federal Laboratories for Materials Science and  
14 Technology, 9014, St. Gallen, Switzerland

15 <sup>6</sup> Transport at Nanoscale Interfaces Laboratory, Empa, Swiss Federal Laboratories for Materials  
16 Science and Technology, 8600, Dübendorf, Switzerland

17 <sup>7</sup> University of Basel, Department of Physics, Basel, 4056, Switzerland

18 <sup>8</sup> University of Basel, Swiss Nanoscience Institute, Basel, 4056, Switzerland

19

20 # shared first author contribution

21 + shared corresponding author contribution

22

23 **Abrasion process and particle collection**

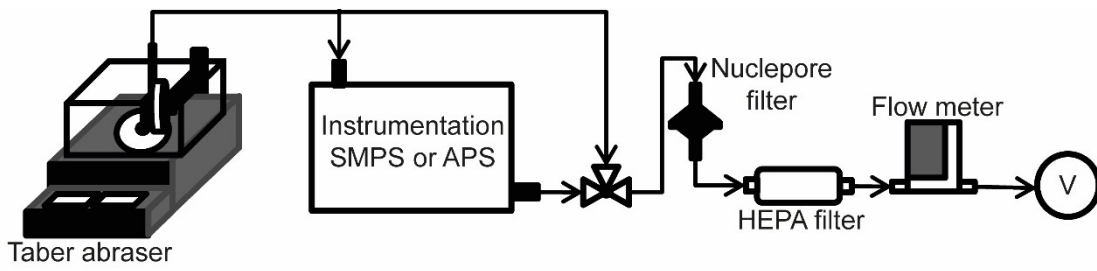

24

25 **Figure S1:** Schematic representation of experimental setup for particle size distribution measurement.

26 **Influence of the rectangular probe on particle sampling**

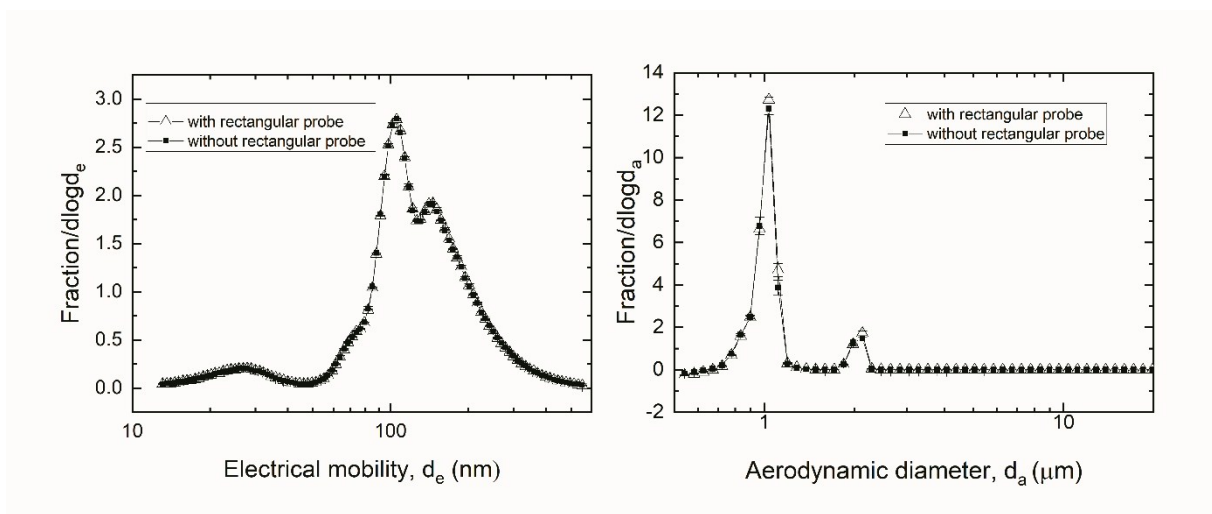

27

28 **Figure S2:** Size distribution of aerosolized PSL particles sampled in presence or absence of a

29 rectangular probe. (a) Samples of aerosolized 105 nm PSL particles measured by SMPS from three

30 independent measurements. (b) Samples of 1 μm and 2 μm PSL particles analyzed by APS from five

31 independent measurements. Data represent mean +/- SD.

32

### 33 Characterization of pristine GRMs and abraded particles

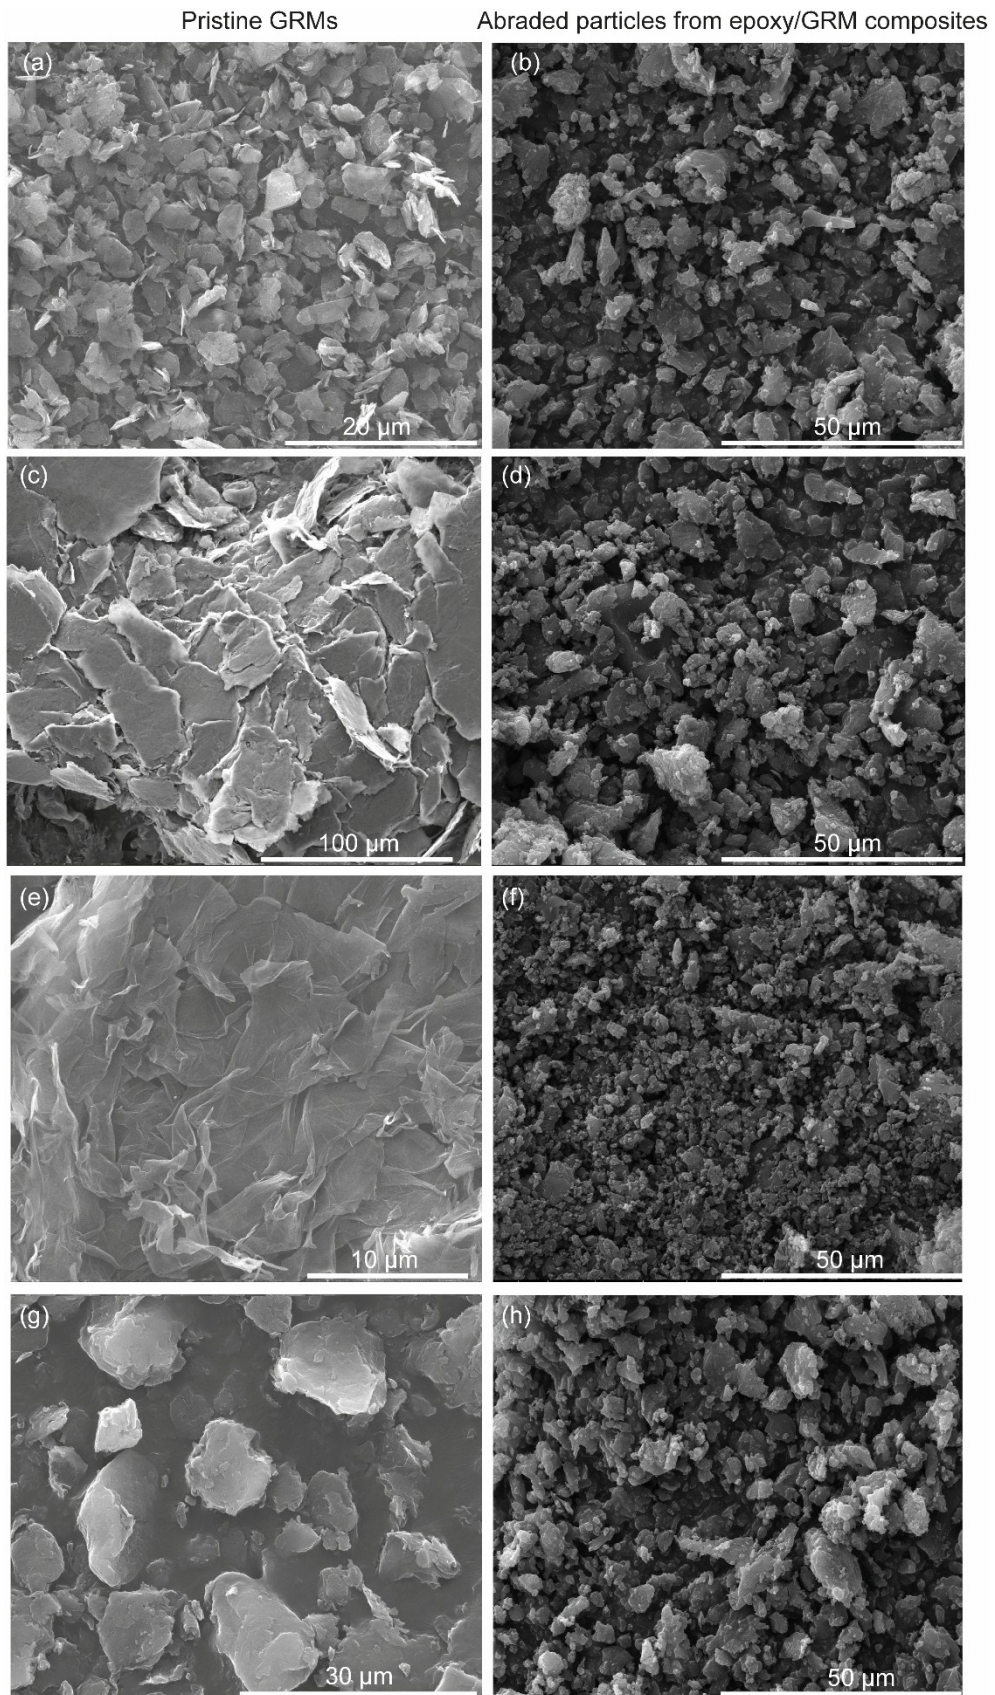

35 **Figure S3:** SEM of pristine GRMs and abraded particles from epoxy/GRM composites. Images of  
 36 pristine and abraded particles from samples of (a,b) GNP-1; (c,d) GNP-2, (e,f) GO-1 and (g,h) rGO.  
 37 From SEM images (Figure S3), in abraded particles from epoxy/GRM composites, GRMs cannot be  
 38 distinguished from epoxy matrix. Therefore, it is not possible to observe the structural transformation  
 39 of GRMs from SEM images. We performed Raman spectroscopy, which can be one of the methods  
 40 used to explain structural transformation of the GRMs in the composites. As shown in Figure 3b, by  
 41 comparing the Raman spectrum of the pristine GNP-2 to that of the GNP-2 in the abraded composite,  
 42 the I(D)/I(G) ratio appeared to have different intensity (spectra B and C). This suggested that GNP  
 43 might be transformed during the fabrication or abrasion process resulting in defected structure. In  
 44 addition, the effect of manufacturing process on the sizes of GRMs were studied by analysis of optical  
 45 microscopic images of GRMs in epoxy matrix, which is demonstrated below.

46

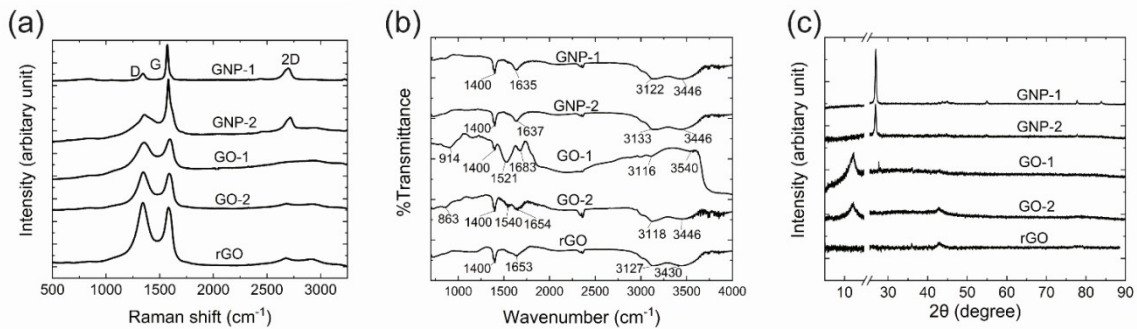

47 **Figure S4:** Characterization of pristine GRMs. (a) Raman spectra (b) FTIR spectra and (c) XRD  
 48 patterns of pristine GRMs.  
 49

50

51 **Table S1** Hydrodynamic size of pristine GRMs

|                                  |  | <b>Z<sub>ave</sub> diameter (nm)/ Pdl</b> |              |                            |                            |                             |
|----------------------------------|--|-------------------------------------------|--------------|----------------------------|----------------------------|-----------------------------|
| <b>GRMs</b>                      |  | <b>GNP-1</b>                              | <b>GNP-2</b> | <b>GO-1</b>                | <b>GO-2</b>                | <b>rGO</b>                  |
| <b>Dispersant</b>                |  |                                           |              |                            |                            |                             |
| <b>Water</b>                     |  | NA                                        | NA           | 765 ± 17.1/<br>0.42 ± 0.03 | 255 ± 1.68/<br>0.18 ± 0.01 | 243 ± 8.13/<br>0.45 ± 0.07  |
| <b>Complete RPMI-1640 medium</b> |  | NA                                        | NA           | 940 ± 87.7/<br>0.55 ± 0.04 | 275 ± 16.1/<br>0.24 ± 0.04 | 95.4 ± 24.0/<br>0.62 ± 0.14 |

52 NA: When polydisperse index (Pdl) is larger than 0.7, the data is not valid and the results are marked  
 53 as NA (Not Applicable). The DLS measurement is not suitable for these particles because GNP-1 and  
 54 GNP-2 are polydisperse and tend to agglomerate.

55

56 **Table S2** Hydrodynamic size of abraded particles from epoxy/GRM composites

| Abraded particles<br>Dispersant | $Z_{ave}$ diameter (nm)/ Pdl    |                                 |             |            |            |           |
|---------------------------------|---------------------------------|---------------------------------|-------------|------------|------------|-----------|
|                                 | Neat epoxy                      | Epoxy/GNP-1                     | Epoxy/GNP-2 | Epoxy/GO-1 | Epoxy/GO-2 | Epoxy/rGO |
| Water                           | 1230 ± 260/<br>0.696 ±<br>0.180 | 1822 ± 139/<br>0.559 ±<br>0.122 | NA          | NA         | NA         | NA        |
| Complete RPMI-1640 medium       | NA                              | NA                              | NA          | NA         | NA         | NA        |

57 NA: When polydisperse index (Pdl) is larger than 0.7, the data is not valid and the results are marked  
 58 as NA (Not Applicable). The DLS measurement is not suitable for most of these particles because they  
 59 are polydisperse and tend to agglomerate.

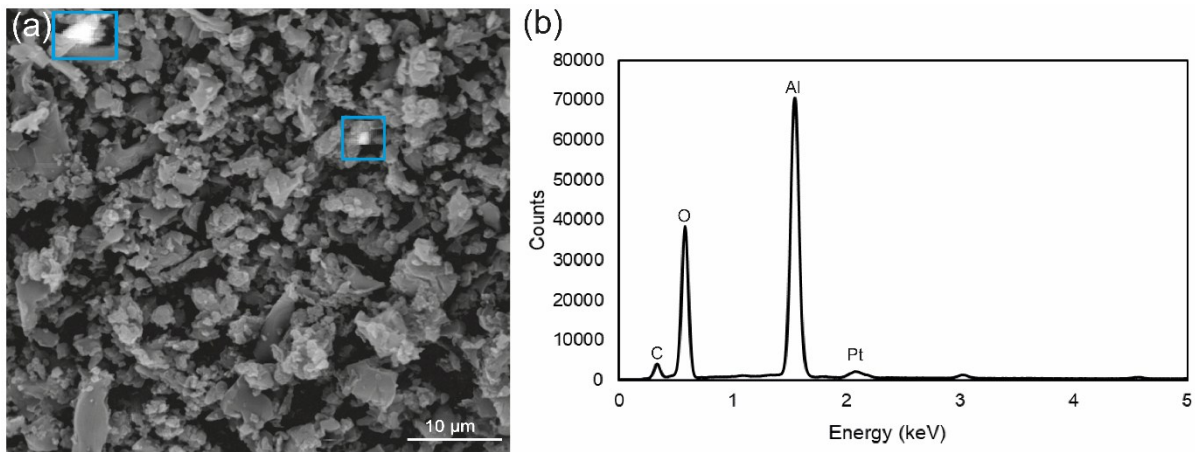

60

61 **Figure S5:** SEM-EDX analysis of abraded particles from neat epoxy. (a) Representative SEM image  
 62 of abraded particles from neat epoxy. Aluminum appears as white spots, which were marked in blue  
 63 boxes. (b) EDX spectrum from point analysis of the white spot marked by a rectangle in (a).

64

65 **Table S3** Summary of the analyzed parameters from the fitted particle size distributions

| Sample     | Parameter            | Mode 1             | Mode 2             | Mode 3             | Mode 4             |
|------------|----------------------|--------------------|--------------------|--------------------|--------------------|
| Neat epoxy | $d_e$ or $d_a^{(a)}$ | $0.333 \pm 0.0073$ | $1.087 \pm 0.0826$ | $2.271 \pm 0.0565$ | -                  |
|            | CMD                  | $0.461 \pm 0.011$  | $1.274 \pm 0.1220$ | $2.516 \pm 0.0548$ | -                  |
|            | $\sigma_g$           | $1.76 \pm 0.01$    | $1.48 \pm 0.04$    | $1.38 \pm 0.01$    | -                  |
|            | F                    |                    | $0.26 \pm 0.01$    | $0.74 \pm 0.01$    | -                  |
| E/GNP-1    | $d_e$ or $d_a^{(a)}$ | $0.302 \pm 0.0123$ | $1.148 \pm 0.0760$ | $2.306 \pm 0.0791$ | -                  |
|            | CMD                  | $0.445 \pm 0.011$  | $1.372 \pm 0.1248$ | $2.605 \pm 0.0710$ | -                  |
|            | $\sigma_g$           | $1.86 \pm 0.03$    | $1.52 \pm 0.05$    | $1.39 \pm 0.01$    | -                  |
|            | F                    |                    | $0.22 \pm 0.01$    | $0.78 \pm 0.01$    | -                  |
| E/GNP-2    | $d_e$ or $d_a^{(a)}$ | $0.314 \pm 0.0102$ | $1.075 \pm 0.0834$ | $2.300 \pm 0.0601$ | -                  |
|            | CMD                  | $0.480 \pm 0.0212$ | $1.259 \pm 0.1323$ | $2.574 \pm 0.0416$ | -                  |
|            | $\sigma_g$           | $1.81 \pm 0.03$    | $1.48 \pm 0.05$    | $1.40 \pm 0.02$    | -                  |
|            | F                    |                    | $0.21 \pm 0.01$    | $0.79 \pm 0.01$    | -                  |
| E/GO-1     | $d_e$ or $d_a^{(a)}$ | $0.338 \pm 0.0159$ | $0.632 \pm 0.0072$ | $0.832 \pm 0.0159$ | $2.075 \pm 0.0249$ |
|            | CMD                  | $0.465 \pm 0.0176$ | $0.637 \pm 0.0066$ | $0.974 \pm 0.0027$ | $2.286 \pm 0.0362$ |
|            | $\sigma_g$           | $1.76 \pm 0.02$    | $1.09 \pm 0.00$    | $1.49 \pm 0.04$    | $1.36 \pm 0.01$    |
|            | F                    |                    | $0.01 \pm 0.00$    | $0.40 \pm 0.03$    | $0.59 \pm 0.03$    |
| E/GO-2     | $d_e$ or $d_a^{(a)}$ | $0.327 \pm 0.0143$ | $0.632 \pm 0.0072$ | $0.847 \pm 0.0078$ | $2.027 \pm 0.0273$ |
|            | CMD                  | $0.460 \pm 0.0257$ | $0.636 \pm 0.0020$ | $0.959 \pm 0.0013$ | $2.303 \pm 0.0412$ |
|            | $\sigma_g$           | $1.77 \pm 0.02$    | $1.09 \pm 0.00$    | $1.42 \pm 0.01$    | $1.43 \pm 0.01$    |
|            | F                    |                    | $0.01 \pm 0.00$    | $0.28 \pm 0.02$    | $0.71 \pm 0.02$    |
| E/rGO      | $d_e$ or $d_a^{(a)}$ | $0.341 \pm 0.0036$ | $0.582 \pm 0.0014$ | $0.891 \pm 0.0164$ | $1.902 \pm 0.0713$ |
|            | CMD                  | $0.479 \pm 0.0142$ | $0.595 \pm 0.0048$ | $1.008 \pm 0.0426$ | $2.123 \pm 0.0573$ |
|            | $\sigma_g$           | $1.79 \pm 0.03$    | $1.15 \pm 0.01$    | $1.42 \pm 0.05$    | $1.39 \pm 0.02$    |
|            | F                    |                    | $0.02 \pm 0.01$    | $0.33 \pm 0.04$    | $0.65 \pm 0.03$    |

66 (a) Mode 1 was obtained from SMPS, whose particle size corresponded to electrical mobility  $d_e$ ,  
67 while mode 2 – 4 were obtained from APS, whose particle size corresponded to aerodynamic  
68 diameter  $d_a$ .

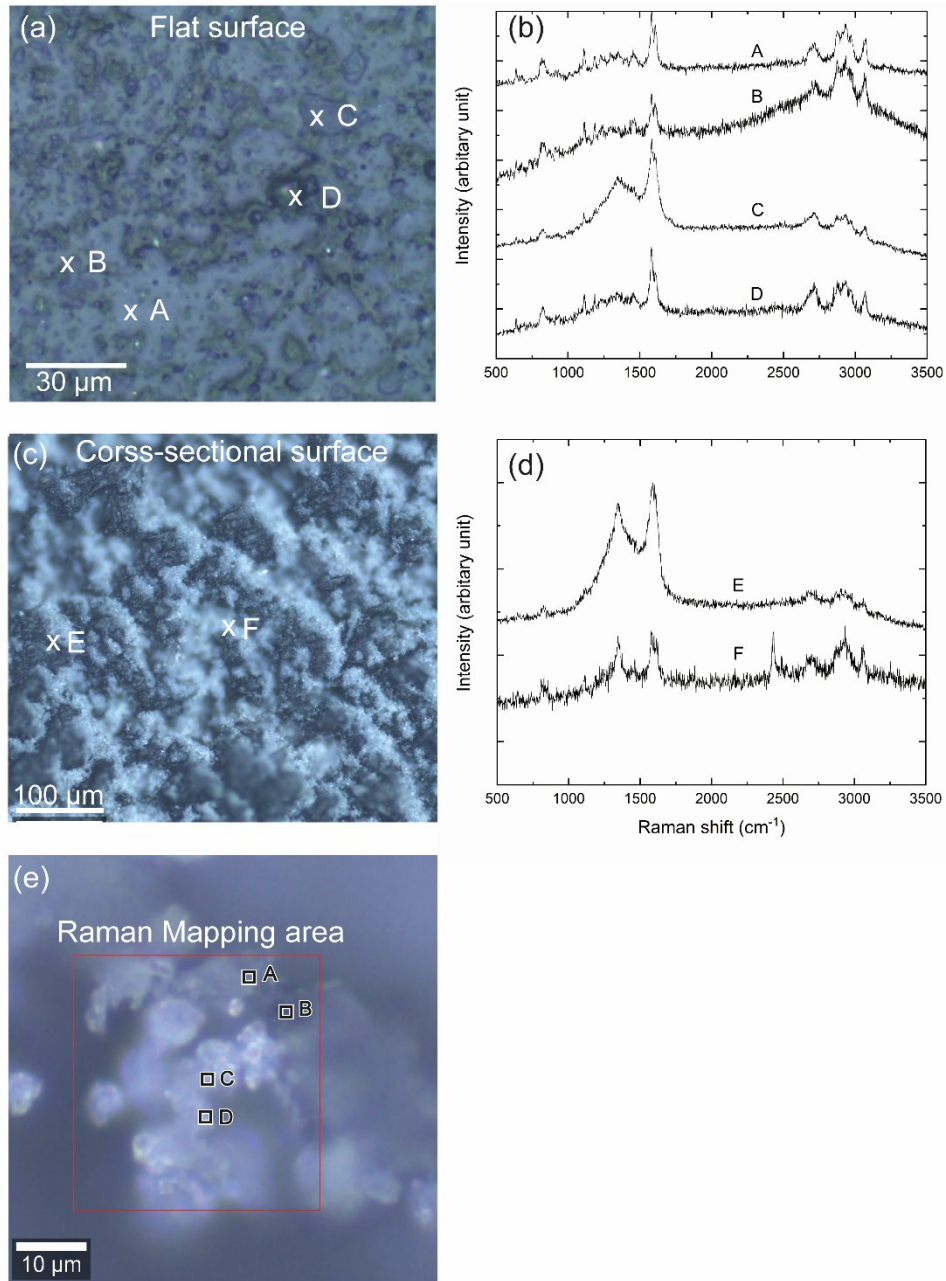

69

70 **Figure S6:** Spots of Raman spectroscopy analysis of (a) flat surface and (c) cross-sectional surface of  
71 E/GNP-2 composites and the corresponding spectra on (b) flat surface and (d) cross-sectional  
72 surface. (e) Optical image of the abraded particles from E/GNP-2 with Raman mapping area marked  
73 by red square and four points (A-D) where the individual spectrum was shown in Figure 3.

74

75 **Effect of manufacturing process on sizes of GRMs**

76 We analyzed the transformation of GRM size using images from SEM and optical microscopy. ImageJ  
77 software was employed to detect the particles and obtain the projected area of the detected particles.  
78 SEM images of pristine GNP-2 (Figure S7) were analyzed by manually drawing the particle edge and  
79 the projected area of the identified particles were calculated using ImageJ. Optical microscopic images  
80 of GRMs in epoxy matrix were analyzed using ImageJ to detect GRM particles and then to calculate  
81 the corresponding particles' projected area. Since the observed GRM particles have irregular shape,  
82 particle size can be referred to projected area equivalent diameter, which is the diameter of a spherical  
83 particle having the same projected area as the considered particle.

84 Since the processing of epoxy/GRM nanocomposites involved high speed mixing, three-roll milling,  
85 addition of hardener and curing, we showed the GRM sizes in the epoxy matrix after two important  
86 steps before curing i.e. high speed mixing and addition of hardener after three-roll milling. Optical  
87 images of GNP-2 particles in epoxy matrix after high speed mixing and after three-roll milling were  
88 displayed in Figure 8a-c and Figure 8d-f, respectively. Figure S9 and Figure S10 show GNP-1 and  
89 GO-1 in epoxy matrix after three-roll milling, respectively.

90 Histograms of the particle sizes of GNP-2 after each step, and GNP-1 and GO-1 after three-roll milling  
91 were summarized in Figure S11. At least three images were analyzed to plot a histogram.

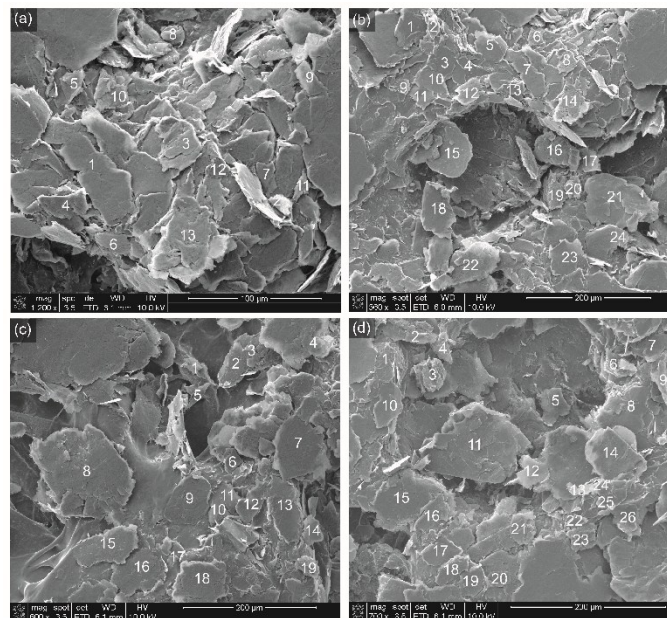

92

93 **Figure S7:** SEM images of pristine GNP-2. Number labelling indicates the particles whose edge could  
94 be identified and thus their corresponding projected area could be analyzed by ImageJ.

95



GNP-2 in epoxy resin after high speed mixing

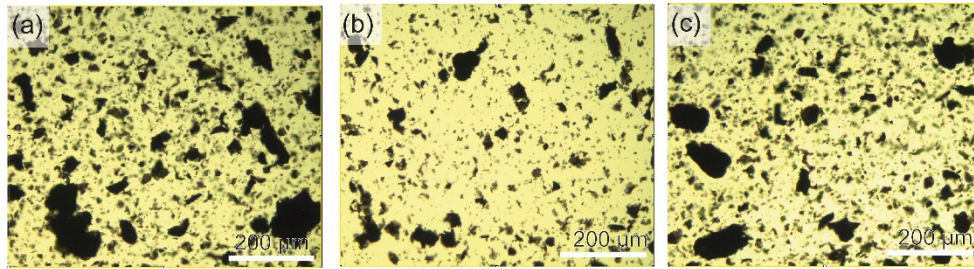

GNP-2 in epoxy resin after high speed mixing, 3-roll milling and adding hardener

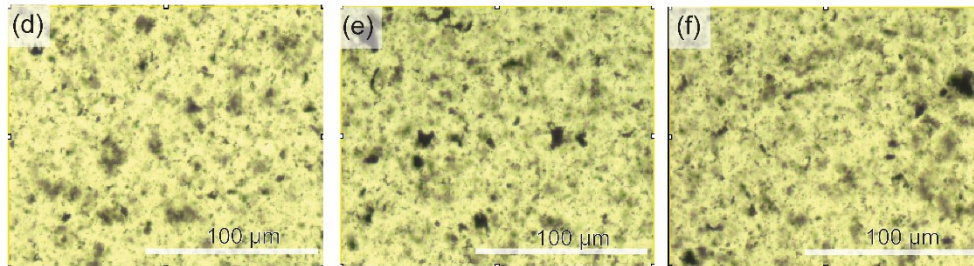

96

97 **Figure S8:** Optical micrographs of GNP-2 in epoxy resin matrix (a)- (c) after high speed mixing and (d)  
98 – (f) after high speed mixing, three-roll milling and adding hardener

GNP-1 in epoxy resin after high speed mixing, 3-roll milling and adding hardener

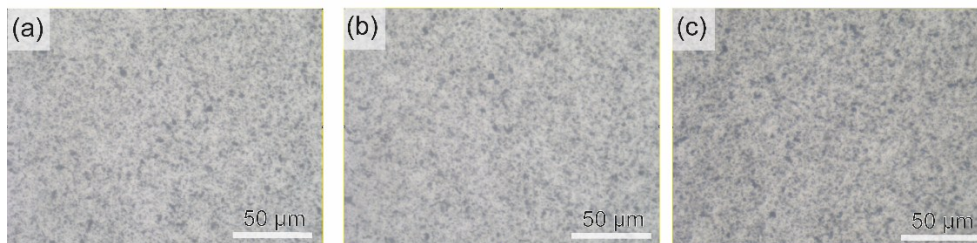

99

100 **Figure S9:** Optical micrographs of GNP-1 in epoxy resin matrix after high speed mixing followed by  
101 three-roll milling and adding hardener

GO-1 in epoxy resin after high speed mixing, 3-roll milling and adding hardener

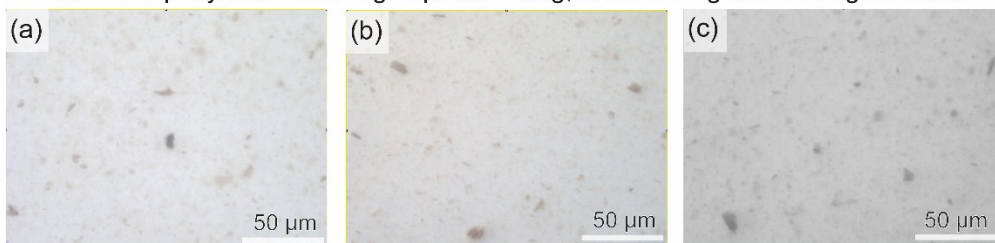

102

103 **Figure S10:** Optical micrographs of GO-1 in epoxy resin matrix after high speed mixing followed by  
104 three-roll milling and adding hardener

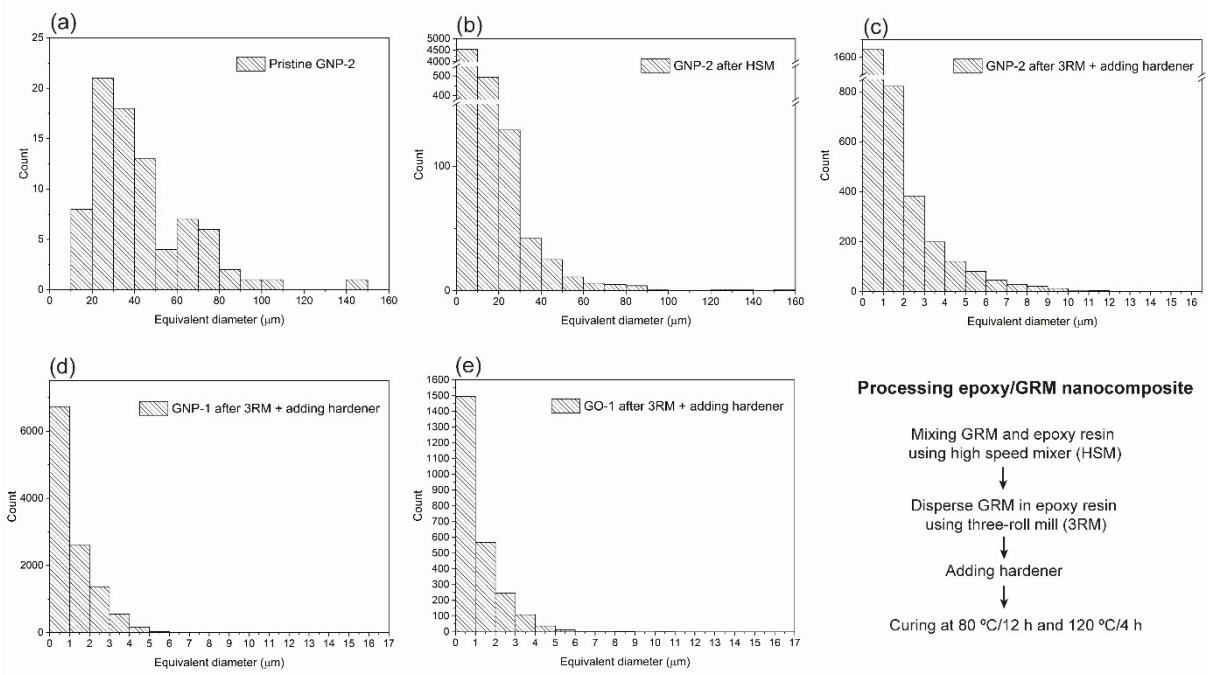

105

106 **Figure S11:** Histograms of GRM size before and during processing of epoxy/GRM nanocomposite.

107 Histogram of (a) pristine GNP-2, (b) GNP-2 in epoxy resin matrix after high speed mixing (HSM), and

108 (c) after three-roll milling (3RM) and adding hardener. Histogram of (d) GNP-1 and (e) GO-1 after

109 three-roll milling and adding hardener.

110

111

112 **Exclusion of interferences of GRMs and abraded neat epoxy particles in the MTS and DCF**  
 113 **assays**

114 MTS interference was performed regarding the ability of GRMs to reduce MTS without cellular  
 115 contribution. The treatment of interference control samples and the assay procedure were identical to  
 116 the protocol described in materials and methods. GRMs and neat epoxy show a certain intrinsic  
 117 absorbance, which was corrected by subtracting the background, but are not reactive, i.e. do not  
 118 process MTS (Figure S7a) when comparing the absorbance to an untreated control (-) including cells.  
 119 To determine the influence of GRMs and neat epoxy quenching an existing fluorescent signal,  
 120 particles were incubated with the fluorescent dye DCF as described in the material and methods.  
 121 Figure S7b shows the relative fluorescence in percentage to the control samples with no GRMs as  
 122 100%, whereas GRM containing samples show the impact on the intensity of the fluorescence.

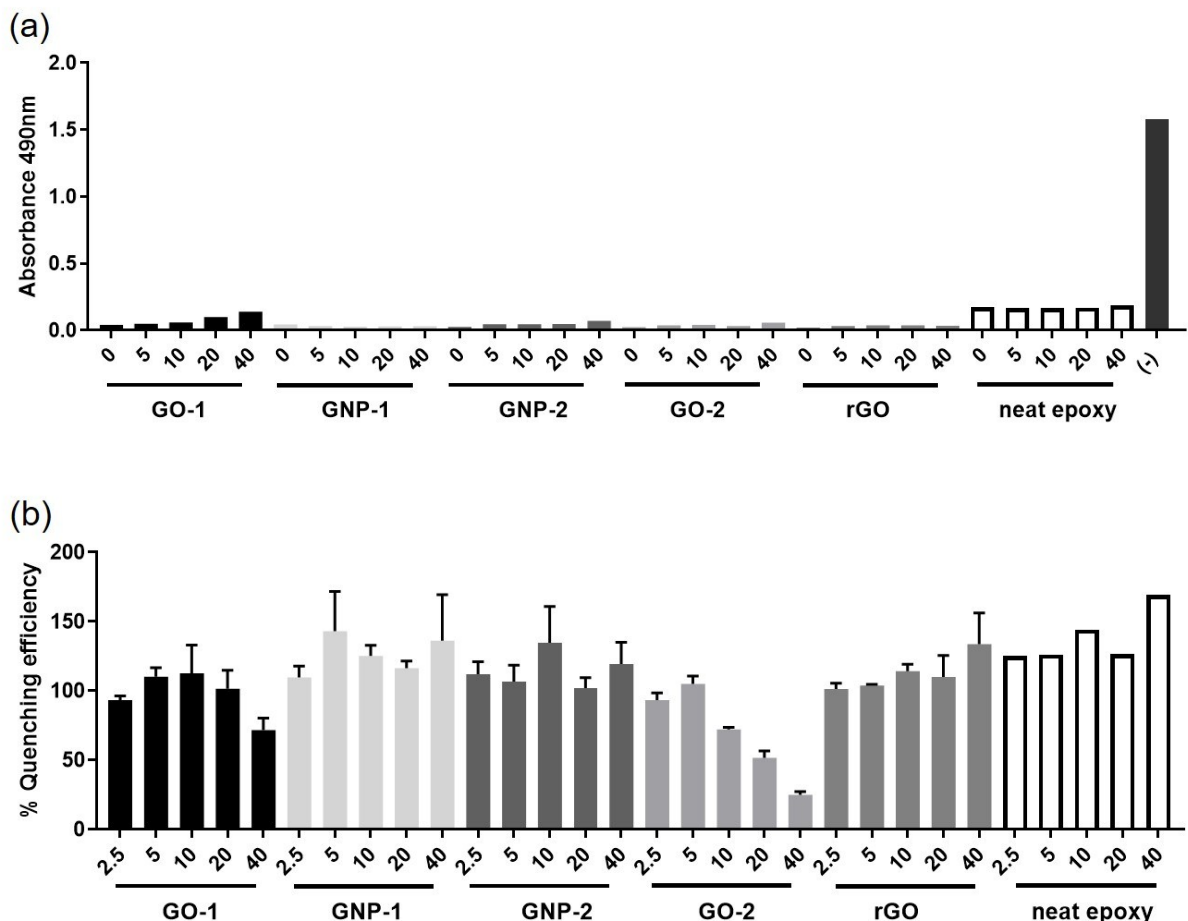

125 **Figure S12:** Interference assessment of the pristine GRMs and neat epoxy with the MTS and DCF  
 126 assay. (a)Pristine GRMs and abraded neat epoxy particles did not interfere with the MTS  
 127 measurements. (-) is a representative absorbance value of an untreated control measurement with

128 THP-1 cells. Data represent a single experiment (b) Abraded neat epoxy particles did not quench, but  
129 GRMs quench an existing DCF signal. % Quenching efficiency displays relative fluorescent values (to  
130 untreated control). Mean values and corresponding standard deviations from three independent  
131 experiments are shown for pristine GRMs while one only one experiment was performed for abraded  
132 neat epoxy particles.

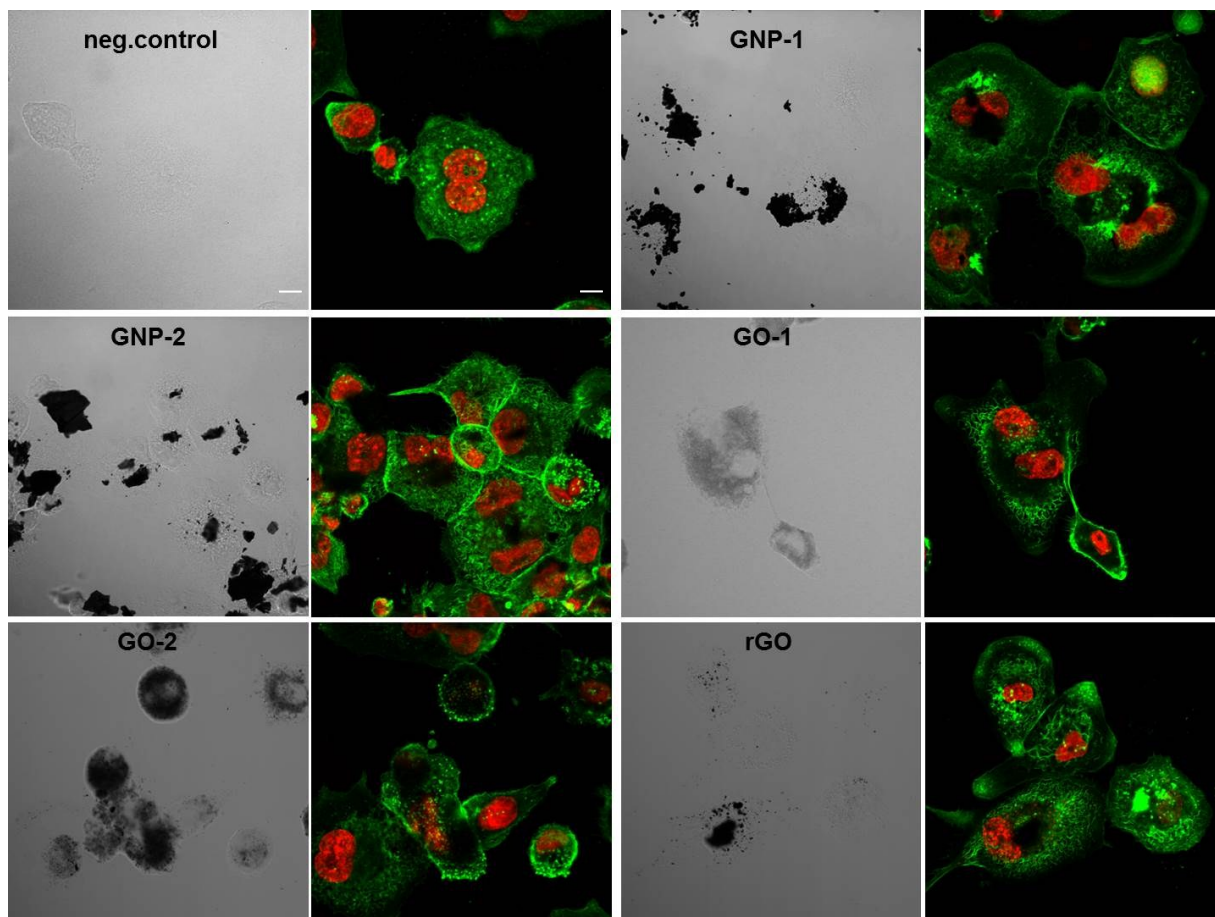

134 **Figure S13:** Light microscopy and confocal microscopy images of THP-1 macrophages exposed to  
135 40µg/mL GRM for 48h, Actin cytoskeleton (green), Nuclei (red) and GRMs (black), scale bar =10µm

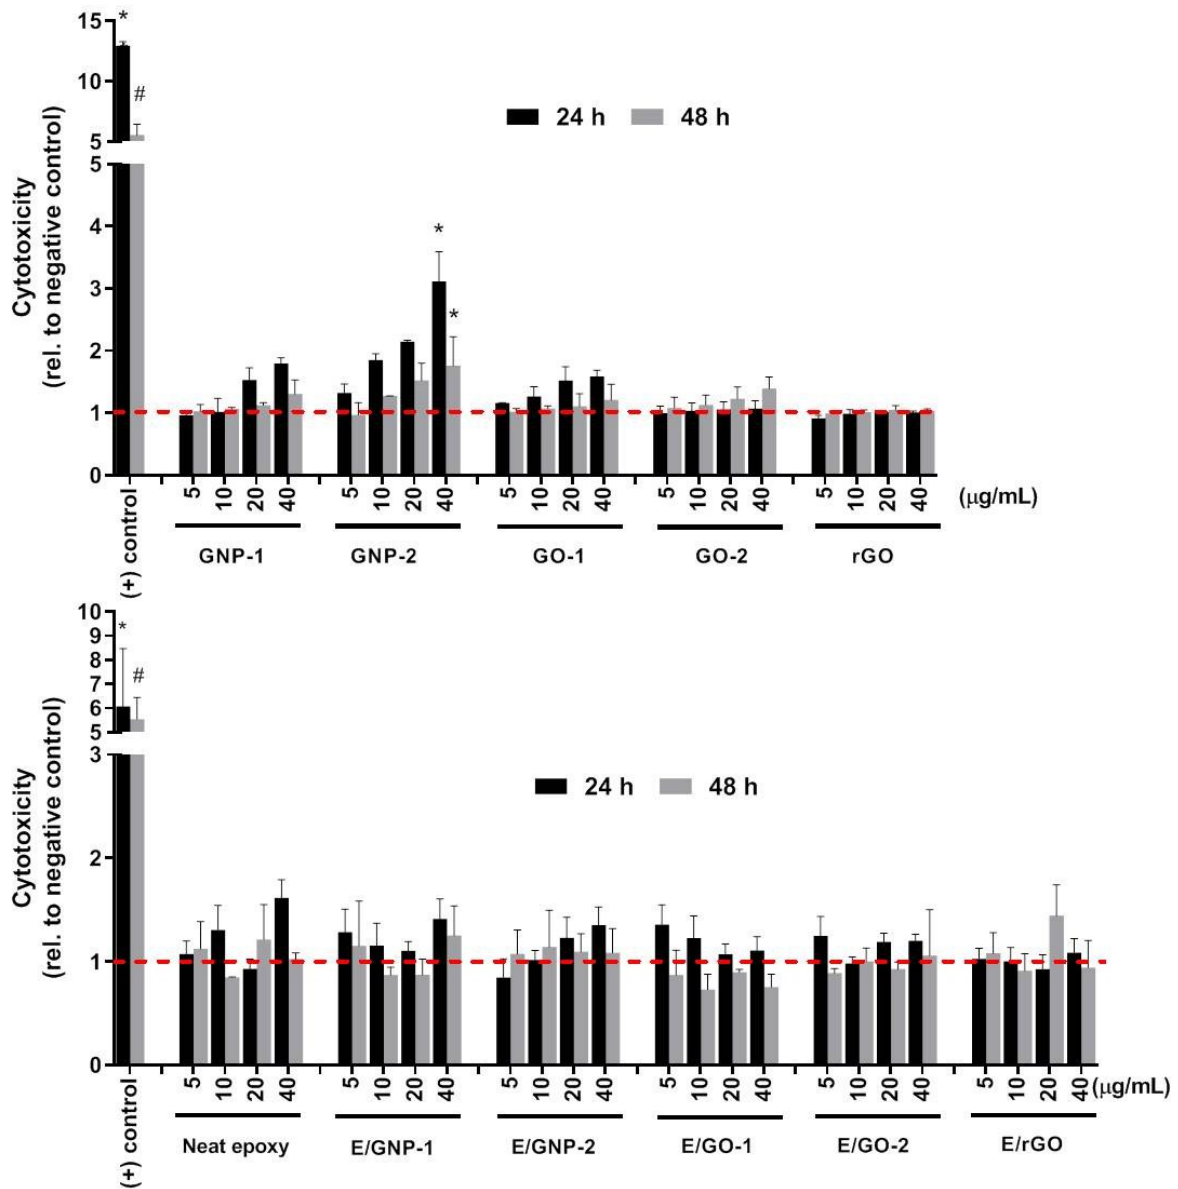

137

138 **Figure S14:** LDH release from THP-1 macrophages after exposure to GRMs and E/GRMs for 24 h  
 139 and 48 h. Data shown represent the mean  $\pm$  StEM of at least three independent experiments. The \*  
 140 symbol represents  $p < 0.05$  as compared to negative control (untreated cells). Incubation of cells for 1h  
 141 to 0.2% Triton-X served as positive control (+)

142
